# Supplementary material
Source: PubMed Central journal article supplement (PMC3093987)
Supplement: supp_108.072645_biolreprod.108.072645-1.pdf [file supp_108.072645_biolreprod.108.072645-1.pdf]

| <b>Supplemental Table S1. Vendor and Catalog numbers for SA and SG media components.</b> |                                 |
|------------------------------------------------------------------------------------------|---------------------------------|
| <b>Component</b>                                                                         | <b>Supplier, Catalog Number</b> |
| <b>1. Base Media/Nutrient Supplements:</b>                                               |                                 |
| StemPro34 SFM Base                                                                       | Invitrogen, 10639-011           |
| 40x StemPro34 nutrient supplement                                                        | Invitrogen, 10639-011           |
| Dulbecco's Modified Eagle's Medium:HamsF12 nutrient mix (1:1)*                           | Sigma, D8437                    |
| B-27 Supplement minus vitamin A*                                                         | Invitrogen, 12587-010           |
| <b>2. Added Small Molecule/Nutrient Components:</b>                                      |                                 |
| d-(+) Glucose                                                                            | Sigma, G7021                    |
| L-glutamine*                                                                             | Invitrogen, 25030-149           |
| 50x Antibiotic-Antimycotic*                                                              | Invitrogen, 15240-062           |
| 50x MEM Vitamins                                                                         | Invitrogen, 11120-052           |
| 50x Non-essential Amino Acids                                                            | Invitrogen, 11140-050           |
| d-Biotin                                                                                 | Sigma, B4639                    |
| Pyruvic Acid, Sodium Salt                                                                | Sigma, P4562                    |
| dl-Lactic Acid (60% Solution)                                                            | Sigma, L7900                    |
| Ascorbic Acid                                                                            | Sigma, A4034                    |
| Sodium Selenite                                                                          | Sigma, S5261                    |
| Putrescine                                                                               | Sigma, P5780                    |
| Progesterone                                                                             | Sigma, P8783                    |
| $\beta$ -Estradiol 17-cypionate                                                          | Sigma, E8004                    |
| 2-Mercaptoethanol*                                                                       | Sigma, M3148                    |
| <b>3. Added Polypeptide Components:</b>                                                  |                                 |
| Bovine Apo-transferrin                                                                   | Sigma, T1428                    |
| Bovine Serum Albumin                                                                     | Calbiochem, 126609              |
| Bovine Insulin                                                                           | Sigma, I1882                    |
| ESGRO (mouse LIF)                                                                        | Chemicon, ESG1107               |
| Recombinant mouse EGF                                                                    | Sigma, E4127                    |
| Recombinant human basic FGF*                                                             | Sigma, F0291                    |
| Recombinant rat GDNF*                                                                    | R&D Systems, 512-GF-050         |

\*Components of SG medium.
